# Supplementary material for: Tapering or Discontinuation of Methotrexate in Stable Disease- Opinions From Rheumatoid Arthritis Patients and Rheumatology Providers at Two Academic Healthcare Centers
Source: Research Square preprint supplement (doi:10.21203/rs.3.rs-9142998/v1), 2026-04-06
Supplement: Supplementary file 2 [file a36f0f275224c39b807f65e9.pdf]

# Patient Methotrexate Tapering Survey

ID # \_\_\_\_\_

For office use only

Dear Valued Rheumatoid Arthritis Patient: Thank you for taking the time to complete this survey. We appreciate your responses to this brief questionnaire. These results will determine if we have enough information to go forward with a study looking at withdrawal of methotrexate in our patients. If you choose not to complete this survey, this will not affect your care from us.

For all appropriate responses, please darken in the circle that responds to your answer.

1. What health network are you being seen at?  Allegheny Health Network  
 Penn State Health

2. What is your current age in years? \_\_\_\_\_

3. What is your preferred gender?  Male  
 Female  
 Non-binary/non-conforming  
 Prefer not to answer

4. Do you identify as Hispanic/LatinX?  Yes  
 No

5. What is your racial identity? (select all that apply)  White  
 Black/African American  
 Asian  
 Native Hawaiian/Other Pacific Islander  
 American Indian/Alaska Native  
 Other  
 Don't know/Not Sure  
 Prefer not to answer

6. Approximately how many years have you had RA? \_\_\_\_\_  
(round to the nearest whole #)

7. Approximately how many years have you been on methotrexate (MTX)? \_\_\_\_\_  
(round to the nearest whole #)

8. Do you ever skip or forget to take your MTX?  Yes  
 No

If you answered yes to #8, please continue to #'s 8a and 8b

8a. If yes, why have you skipped or forgotten to take your MTX? \_\_\_\_\_  
(one sentence answer preferred)

8b. If yes, how often do you skip or forget to take your MTX? \_\_\_\_\_

9. Considering all the ways your arthritis affects you, rate:

9a. How well are you doing on the following scale (with 0 being very well and 10 being very poor)

0 0.5 1.0 1.5 2.0 2.5 3.0 3.5 4.0 4.5 5.0 5.5 6.0 6.5 7.0 7.5 8.0 8.5 9.0 9.5 10

---

**9b.** How well you were doing at the time of your diagnosis on the following scale (with 0 being very well and 10 being very poor)

0 0.5 1.0 1.5 2.0 2.5 3.0 3.5 4.0 4.5 5.0 5.5 6.0 6.5 7.0 7.5 8.0 8.5 9.0 9.5 10

---

**10.** Over the past year, do you think your RA has been well controlled?  Yes  No

---

**11.** Have you or your doctor ever tried to reduce the dose or stop your MTX?  Yes  No

---

If you answered yes to #11, please continue to #'s 11a and 11b

---

**11a.** If yes, was it you or your doctor that suggested it?  Yourself  Doctor

---

**11b.** Why? (select all that apply)  Infection  Side effects  Abnormal labs  I was doing great!  Other  Don't know/Not Sure

---

**11c.** If you answered "Other" in question 11b, please explain in a couple of words \_\_\_\_\_

---

**12.** If your RA was in remission or well controlled and your rheumatologist thought it was possible to decrease or stop your MTX, would you consider that option?  Yes  No

---

**13.** Do you have any concerns with reducing or stopping MTX?  Yes  No

---

If you answered yes to #13, please continue to #13a

---

**13a.** If yes, why? (select all that apply)  Risk of flare  Worsening disease  Tried it before but it did not work  Other  Don't know/Not Sure

---

**13b.** If you answered "Other" in question 13a, please explain in a couple of words \_\_\_\_\_

---

**14.** Do you have any concerns about staying on MTX long term?  Yes  No

---

If you answered yes to #14, please continue to #14a

---

**14a.** If yes, in a couple of words, please state your top reason \_\_\_\_\_

---

Thank you!
